# Supplementary material for: Arginine methylation and citrullination of splicing factor proline- and glutamine-rich (SFPQ/PSF) regulates its association with mRNA
Source: PubMed Central journal article supplement — RNA. 2015 Mar;21(3):347–59. doi: 10.1261/rna.045138.114 (PMC4338332; doi:10.1261/rna.045138.114), 2015-03

# Supplementary Material

## MS spectra of all SFPQ modifications

### S(dimeR)GGGGGGFHR

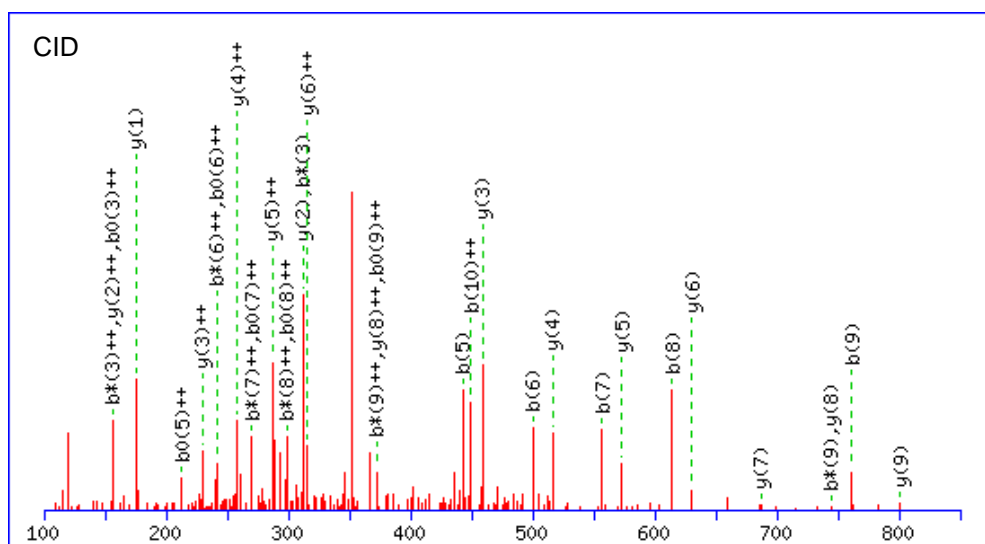

### S(dimeR)GGGGGGFHR

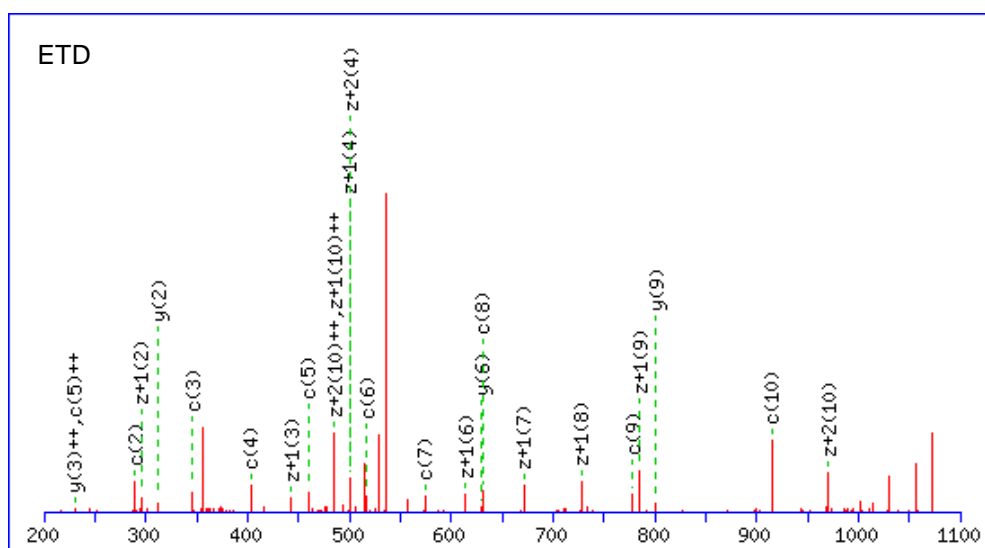

### F(dimeR)S(dimeR)GGGGGGFHR

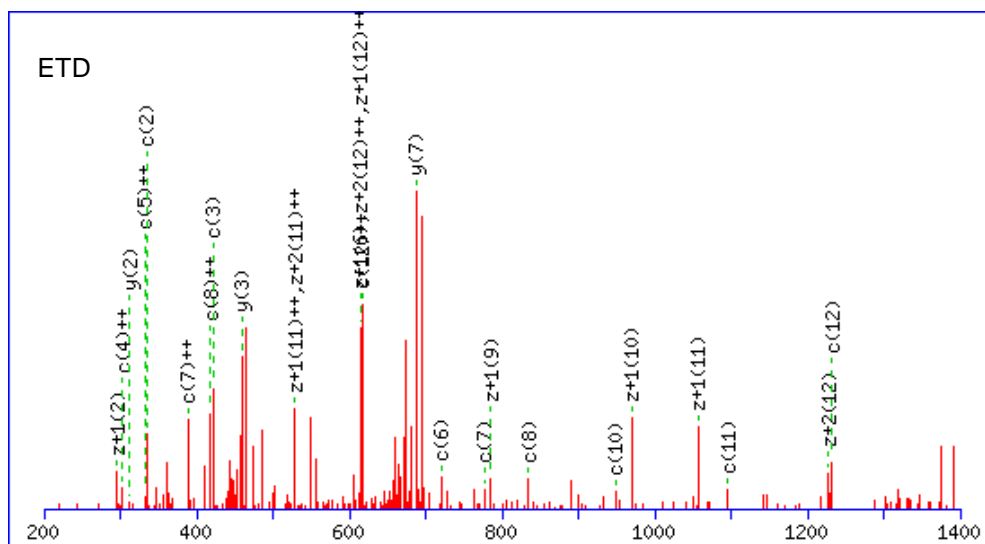

F(dimerR)S(dimerR)GGGGGFH(meR)

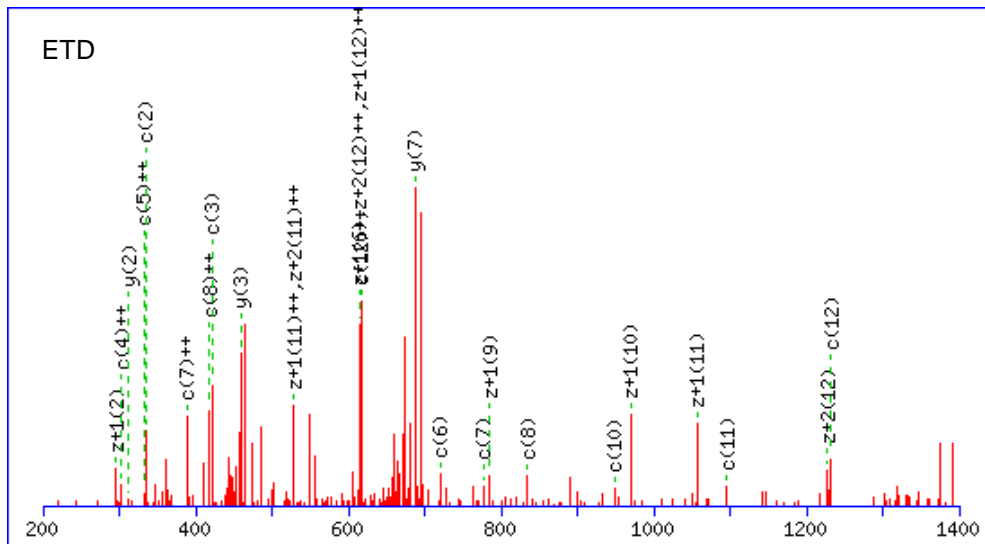

(Rdime)GGGGG(dimerR)GGLHDFR

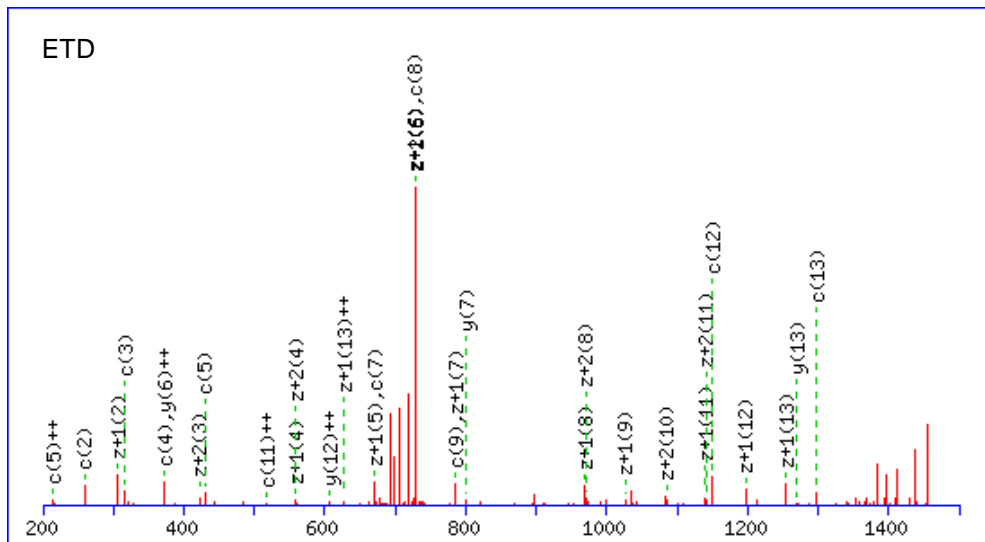

GMGPGTPAGYG(meR)GR

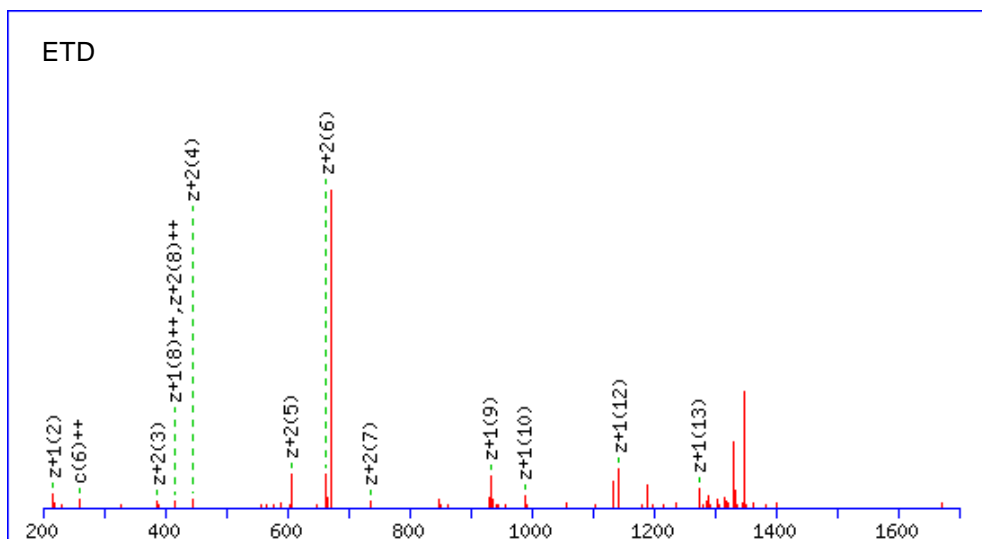

### GMGPGTPAGYG(meR)

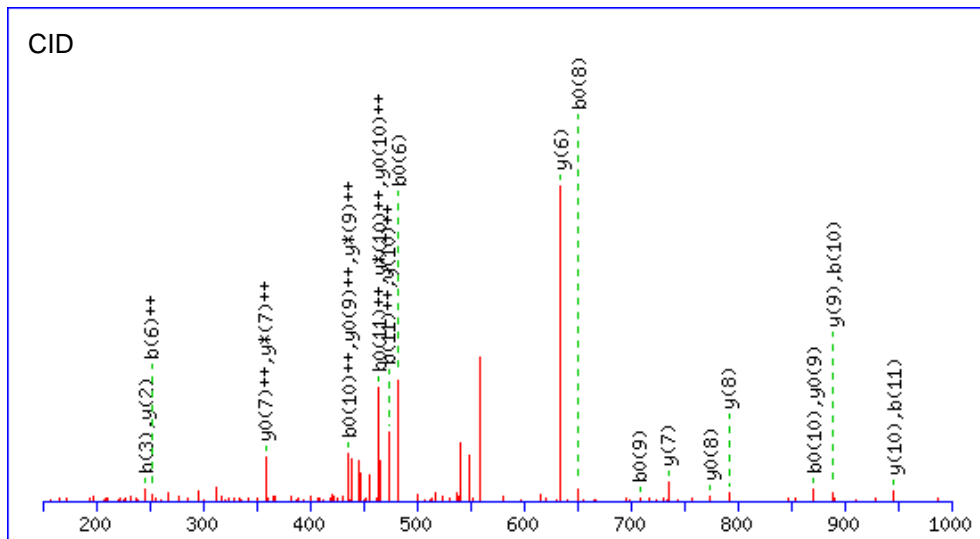

### S(heavy dimerR)GGGGGGFHR

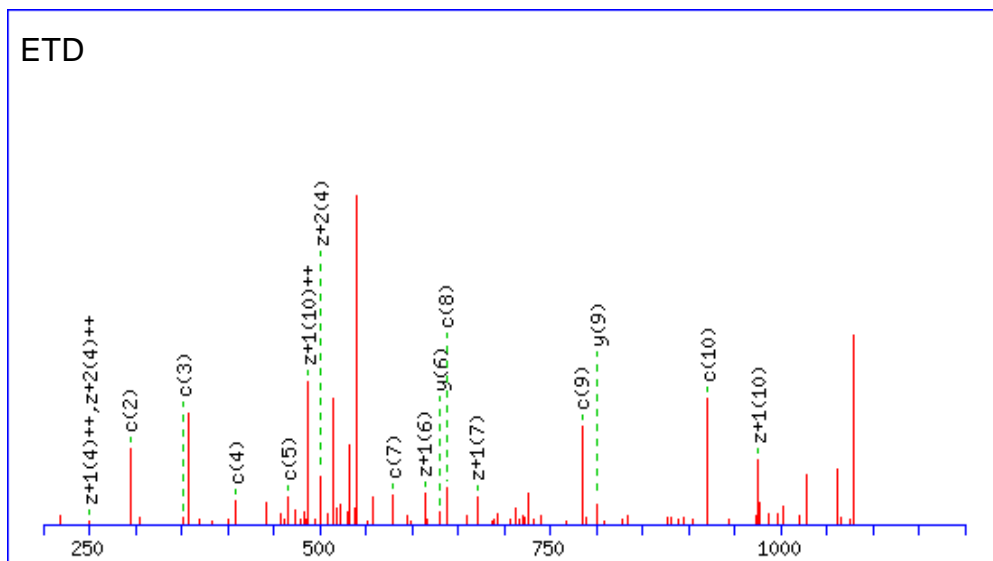

### (heavy dimerR)GGGGG(heavy dimerR)GGLHDFR

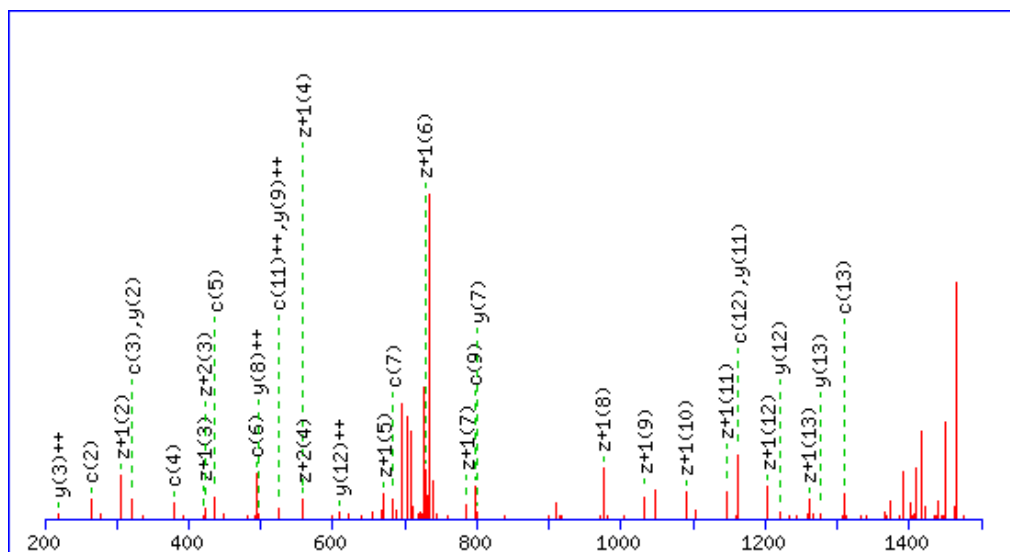

F(heavy dimeR)S(heavy dimeR)GGGGGGFHR

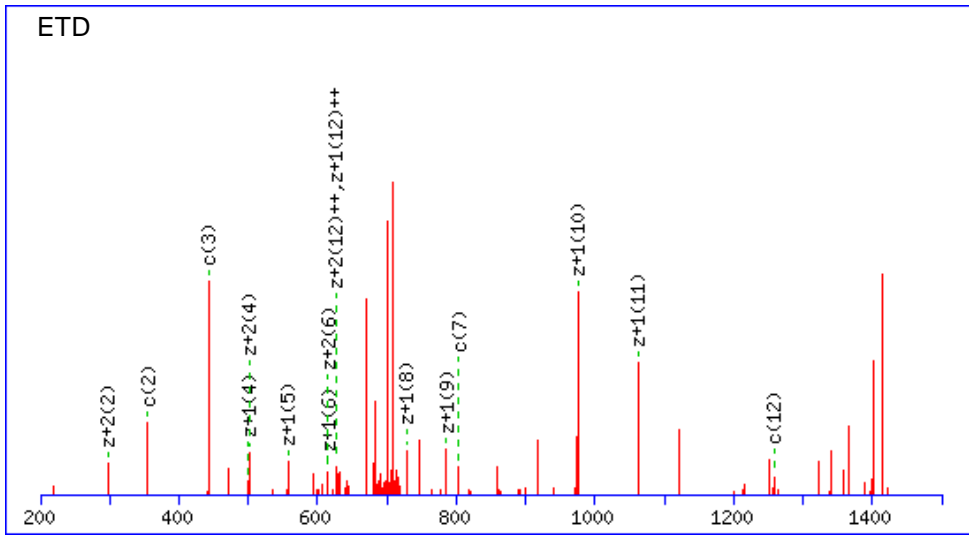

GMGPGTPAGYG(heavy meR)GR

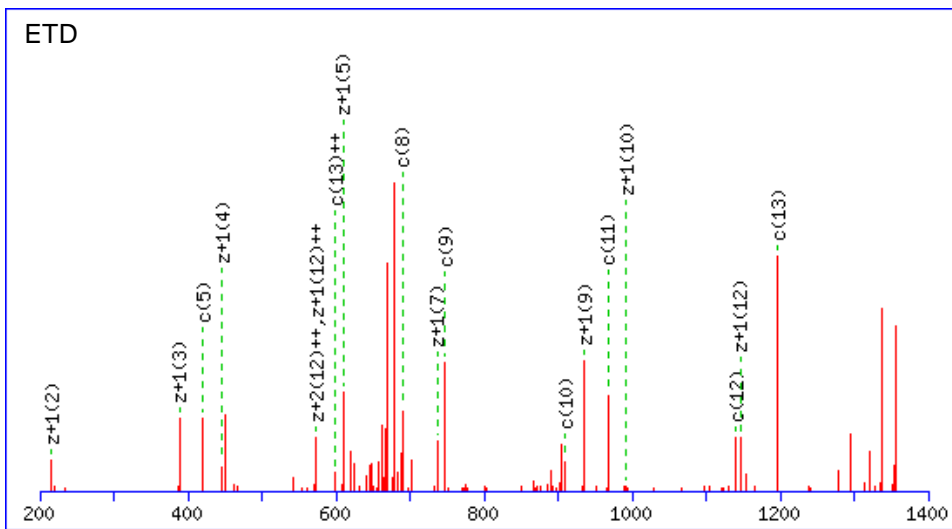

GGGGGCiGGGLHDFR

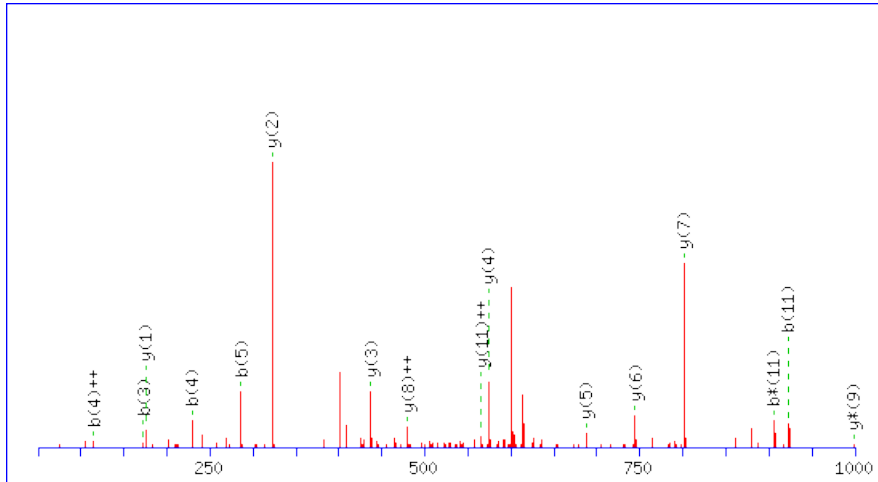

SCiGGGGGGFHR

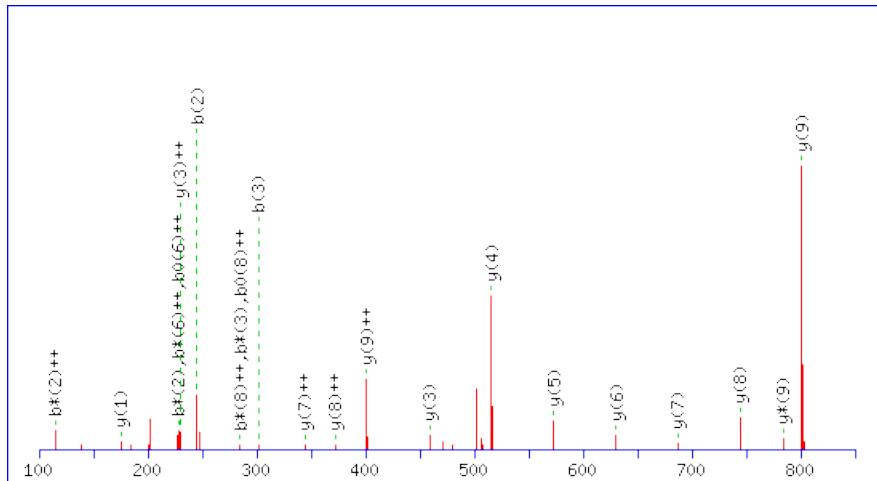

**SCitGGGGGGFHR**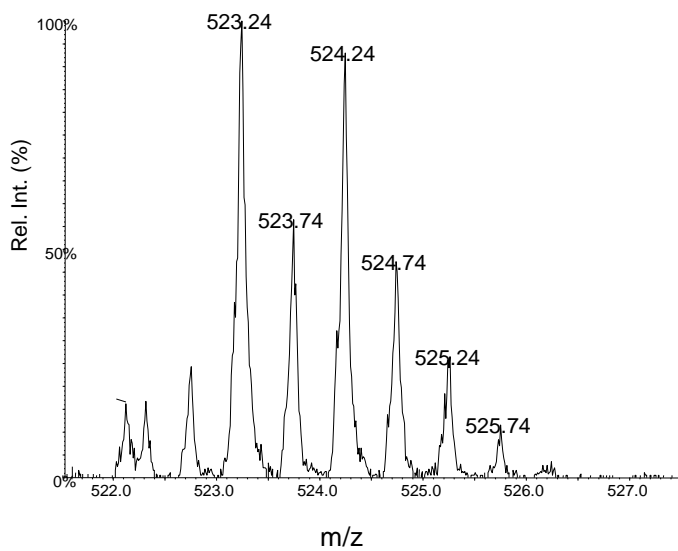**A****RGGGGGCitGGLHDFR**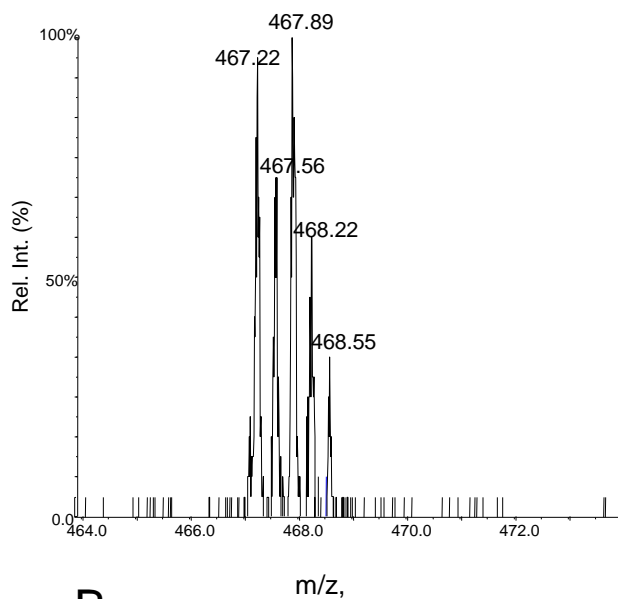**B****GGGGGCitGGLHDFR**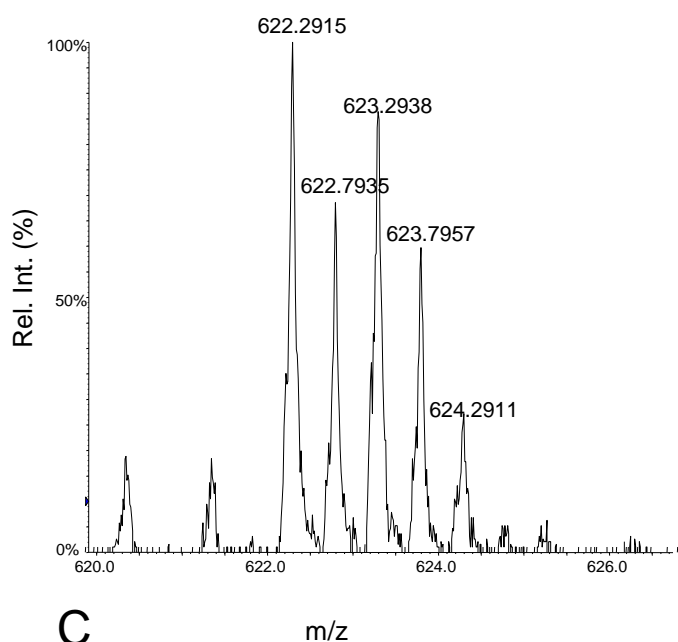**C****CitGGGGGCitGGLHDFR**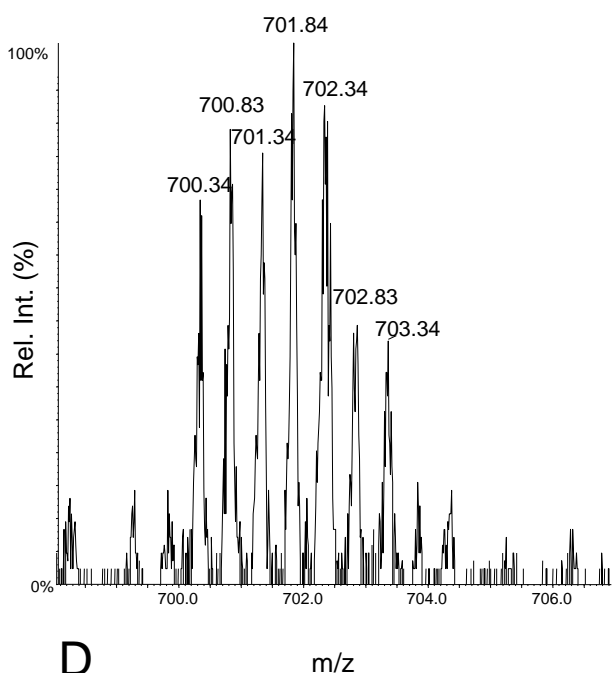**D**

Mass spectrometry analysis of citrullinated PSF. ESI TOF MS spectra of in vitro citrullinated PSF using PADI4 in the presence of 50% in the presence of 50% H<sub>2</sub><sup>18</sup>O. The ESI MS spectra of the citrullinated peptides A) **SCitGGGGGGFHR** [M+2H]<sup>2+</sup> B) **RGGGGGCitGGLHDFR**, C) **GGGGGCitGGLHDFR** and D) **CitGGGGGCitGGLHDFR** modified peptides [M+2H]<sup>2+</sup>. The characteristic isotopic distribution was used to verify citrullinated peptides from PSF.

### Deamidated R1, R7 100.00%

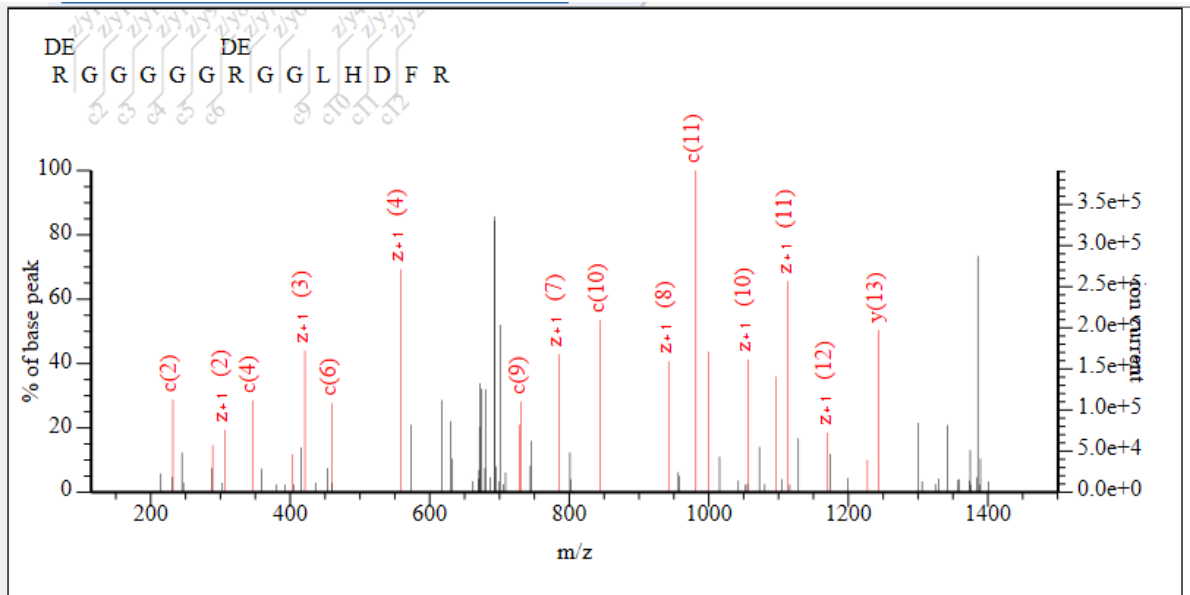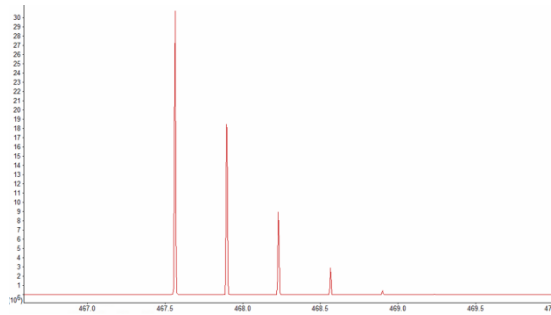

### Deamidated R7, Dimethyl R1; 100.00%

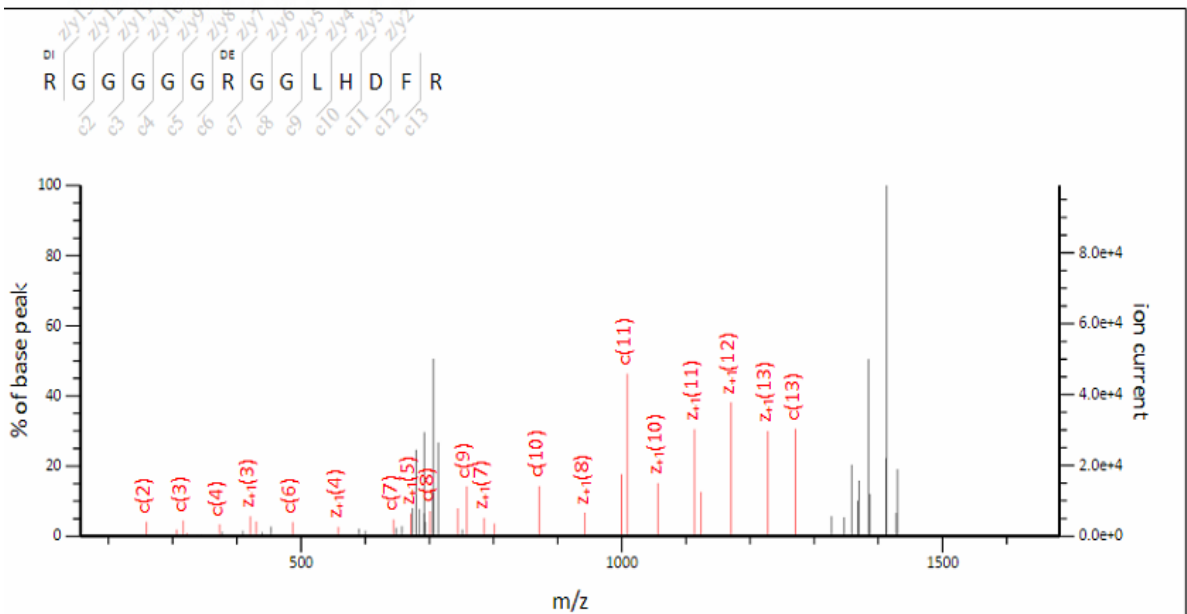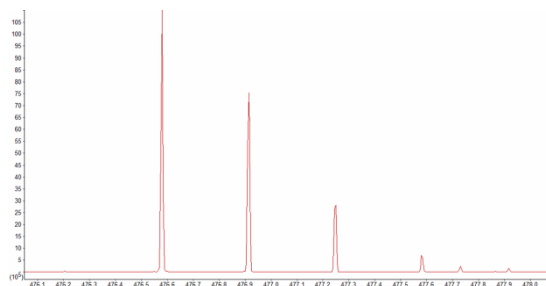

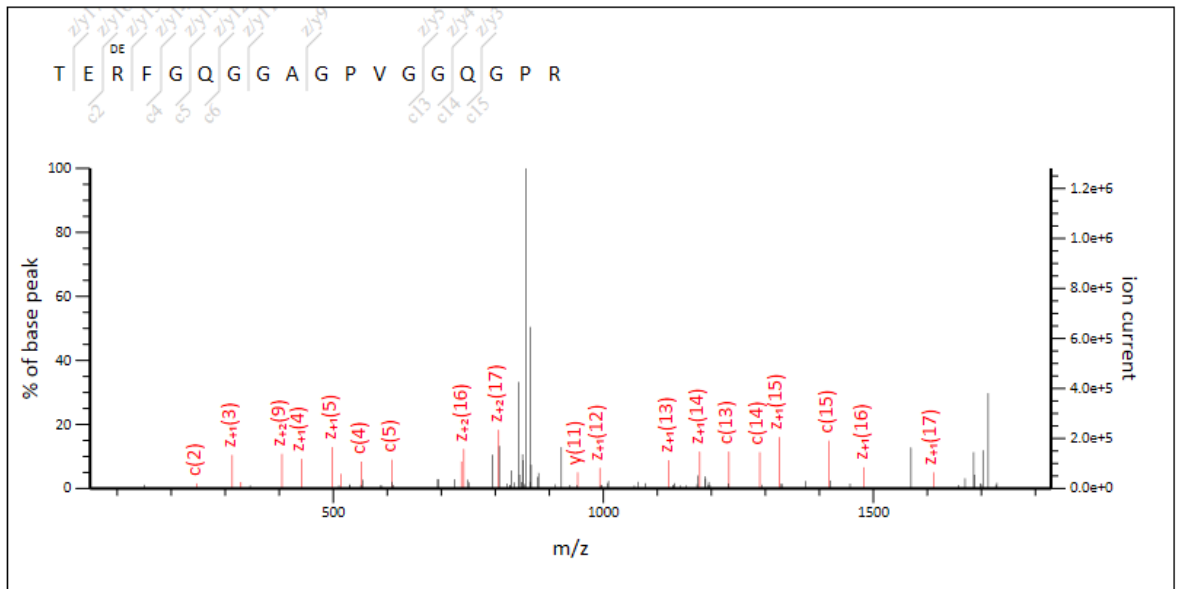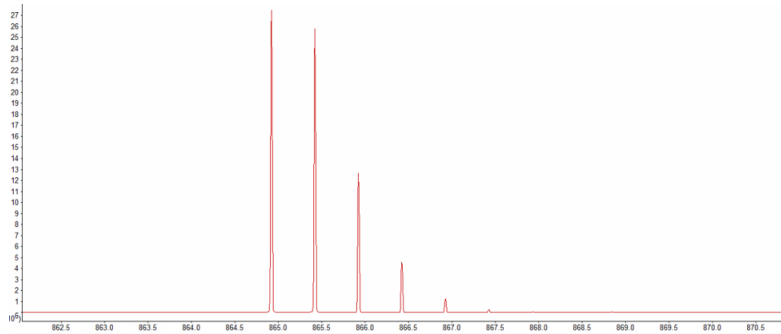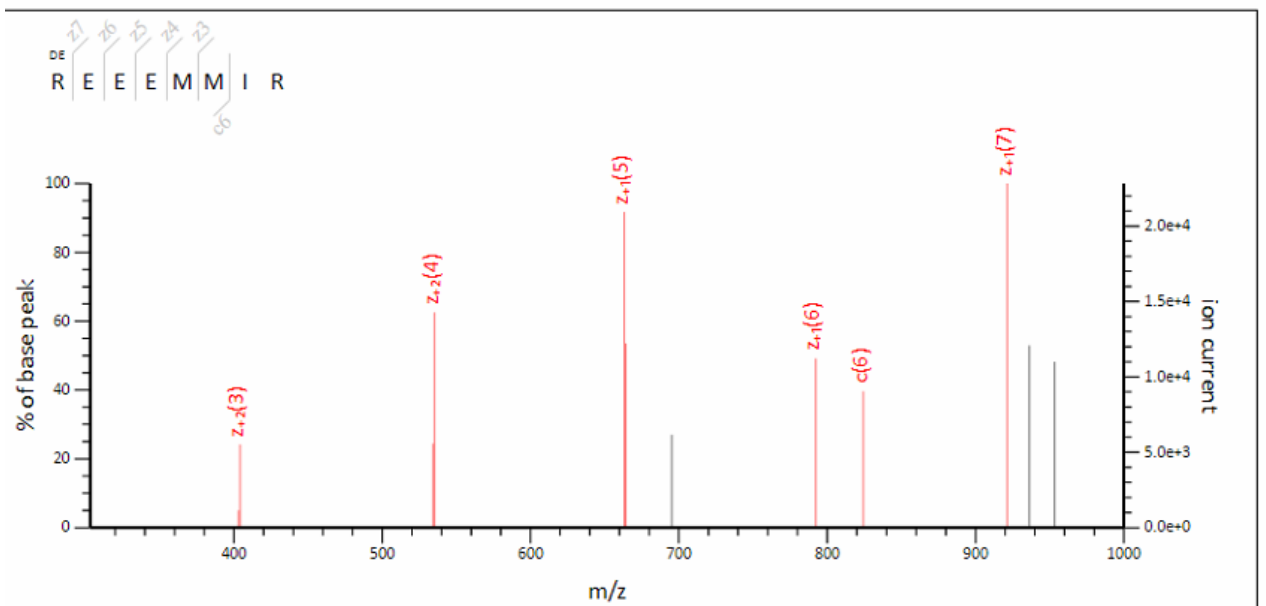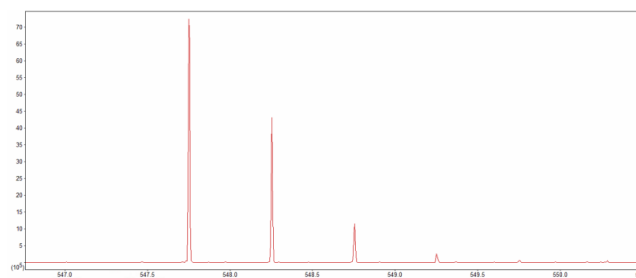



Deamidated R2, Dimethyl R4;

99.97%

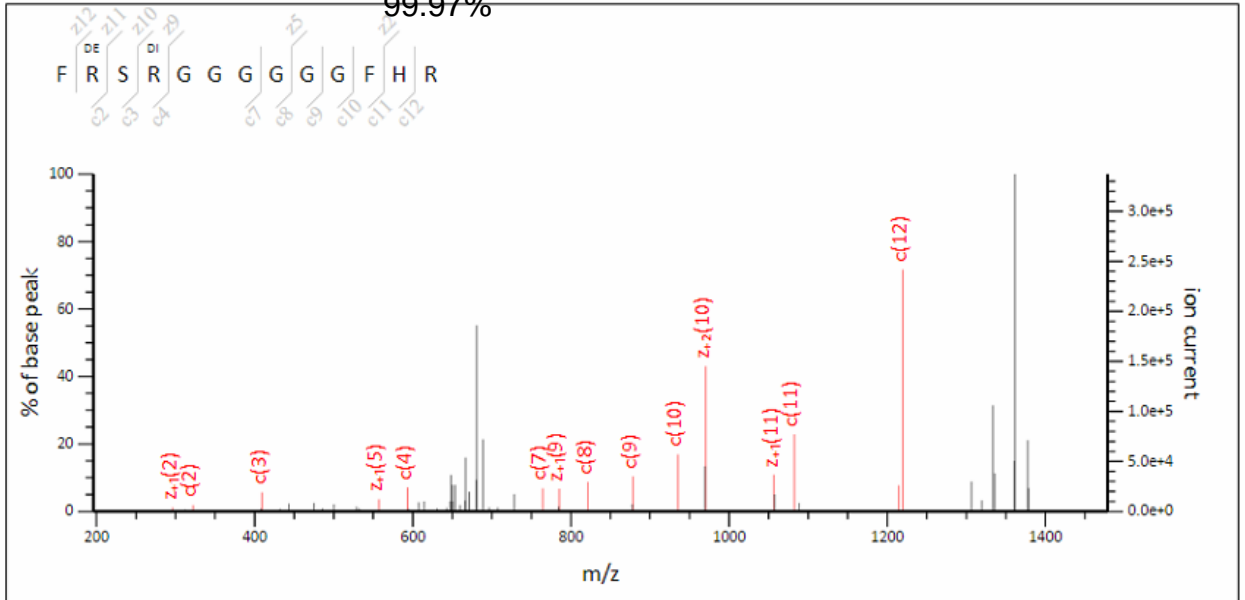

Deamidated R12, Methyl R14; 69.66%

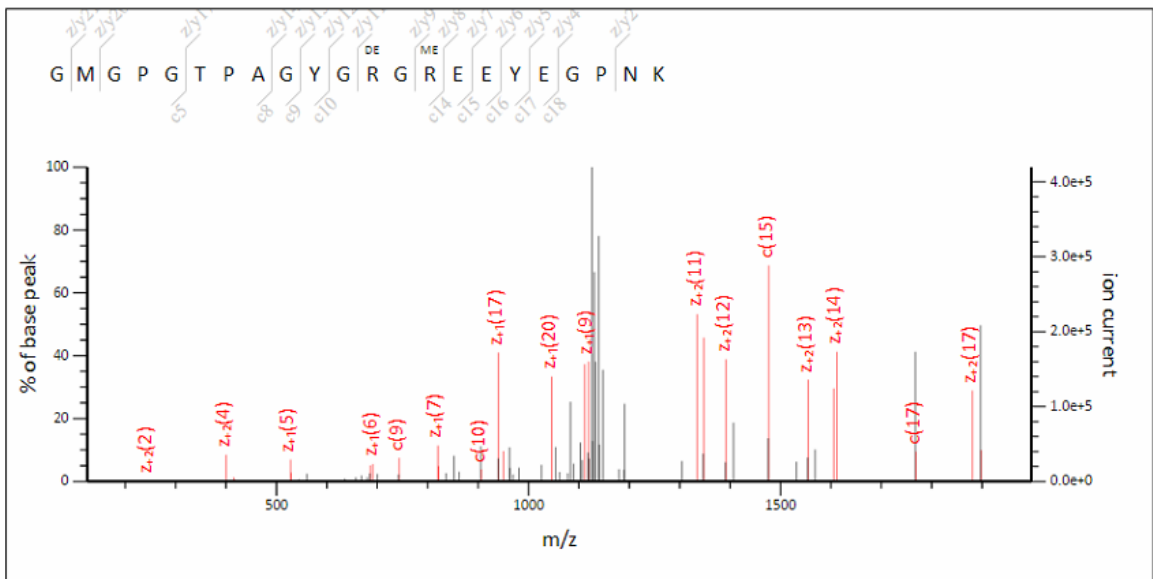

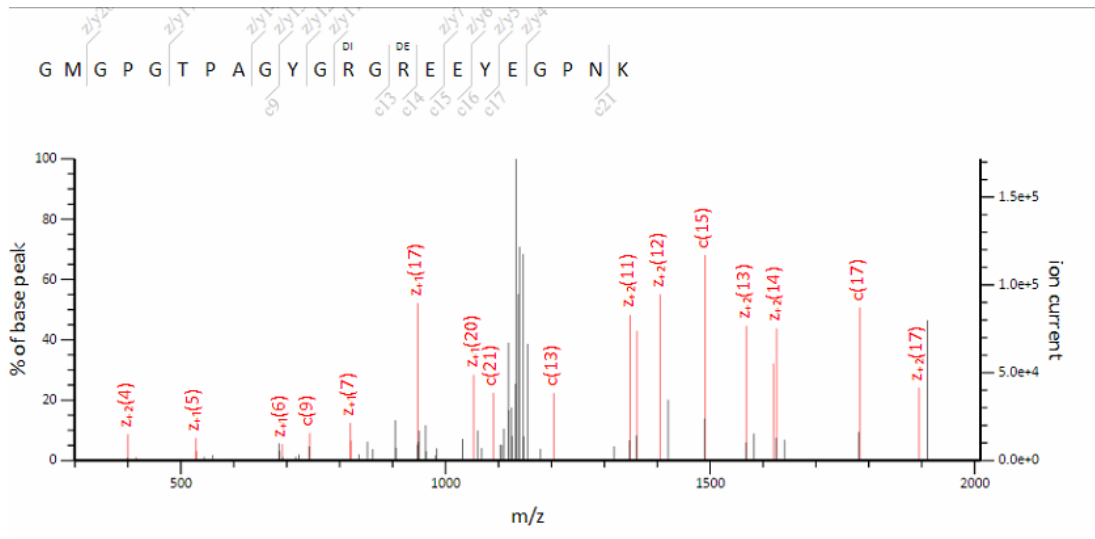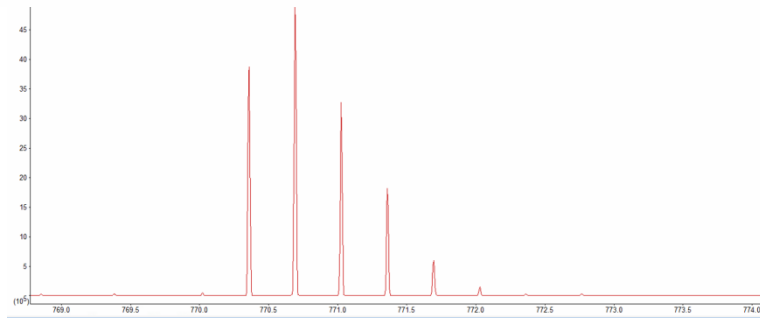

Deamidated R14, R25, Methyl R12; 97.74%

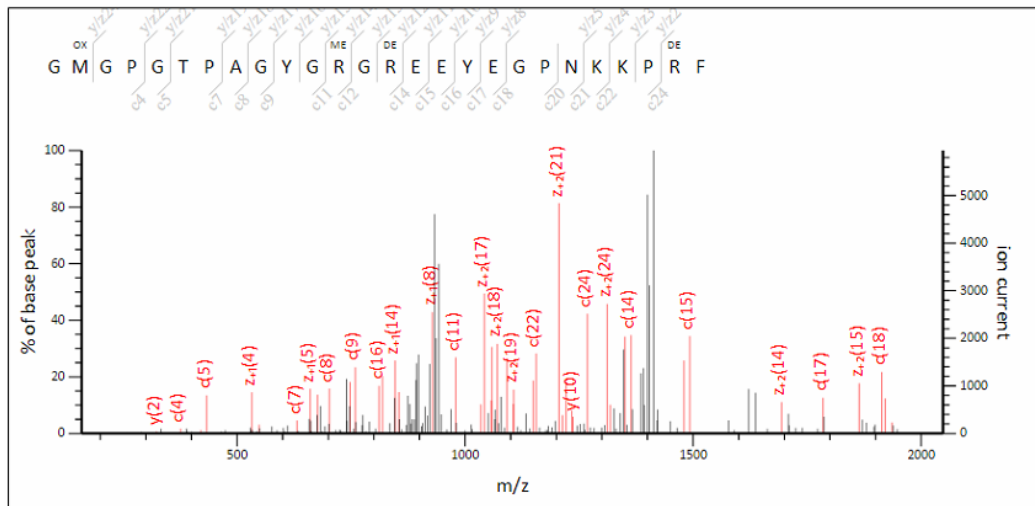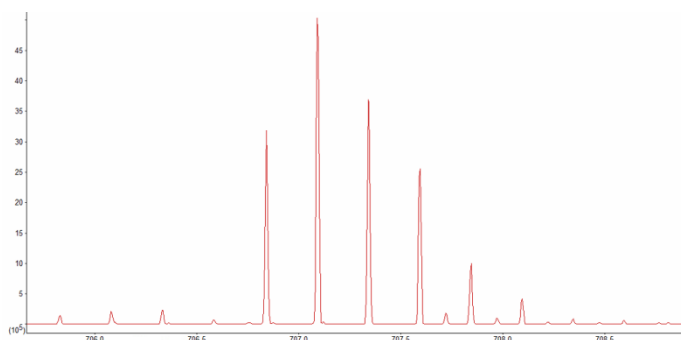

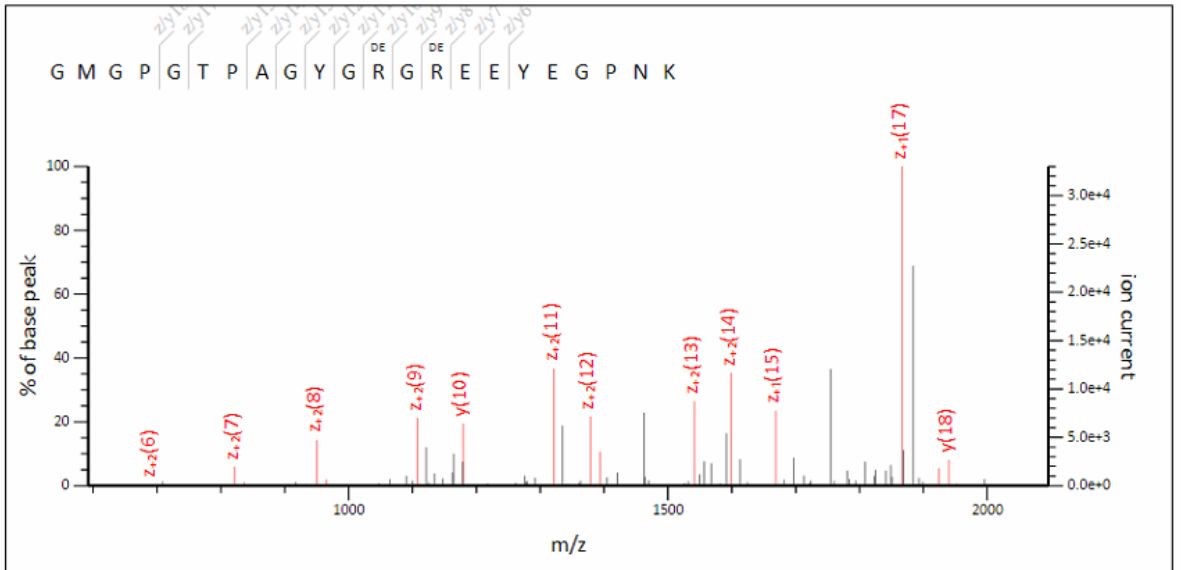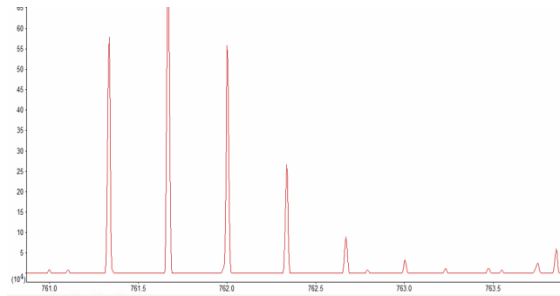

Deamidated R14, R25, Dimethyl R12; 96.61%

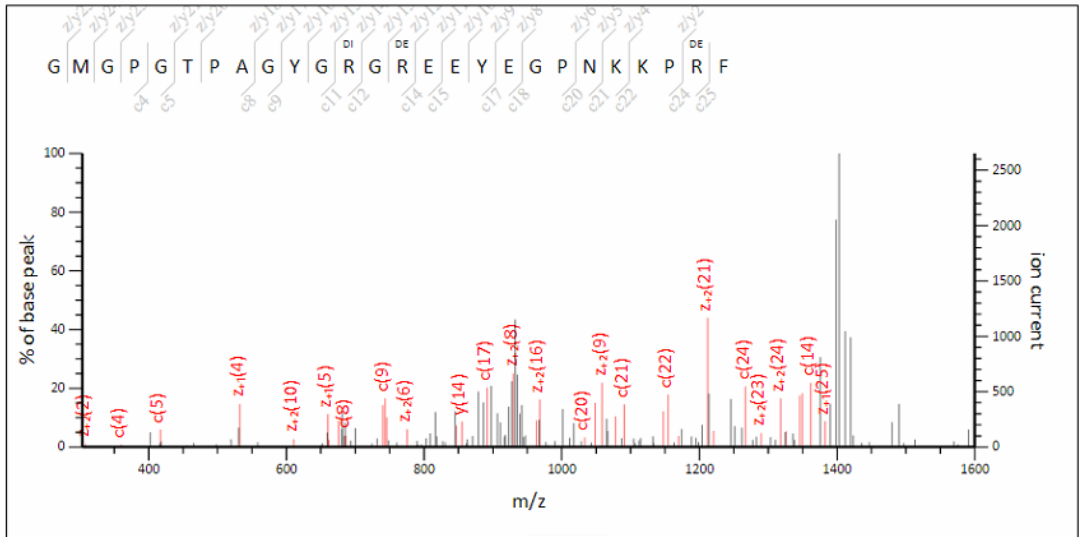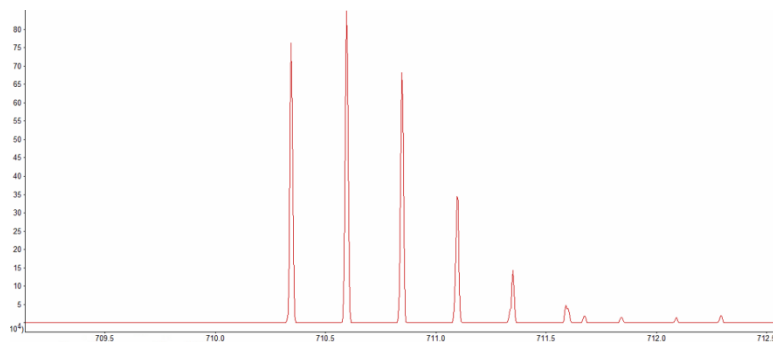

Supplement: supp_045138.114_SuppMaterial.pdf [file supp_045138.114_SuppMaterial.pdf]
