# Supplementary material for: Arginine methylation and citrullination of splicing factor proline- and glutamine-rich (SFPQ/PSF) regulates its association with mRNA
Source: PubMed Central journal article supplement — RNA. 2015 Mar;21(3):347–59. doi: 10.1261/rna.045138.114 (PMC4338332; doi:10.1261/rna.045138.114), 2015-03
Supplement: supp_045138.114_SuppTableS1.pdf [file supp_045138.114_SuppTableS1.pdf]

## Supplementary Table S1

Proteins identified from the Ni-NTA PhyCap OTC enrichment of the SFPQ/NONO complex from HeLa nuclear extracts. Highlighted cells indicate proteins which were also identified in the studies of Peng et al, 2006 and Rappsilber et al., 2002. Green highlighted cells indicate exact match with the protein identified, orange highlighting indicates a similar protein identification.

| <b>SWISS-<br/>PROT<br/>Accession</b> | <b>Name</b>                                                  | <b>Peng <i>et al</i>,<br/>2006</b> | <b>Rappsilber<br/><i>et al</i>, 2002</b> | <b>Notes</b>      |
|--------------------------------------|--------------------------------------------------------------|------------------------------------|------------------------------------------|-------------------|
| P02545                               | Lamin-A/C                                                    |                                    |                                          | His-Rich          |
| Q15233                               | Non-POU domain-containing octamer-binding protein (p54nrb)   |                                    |                                          | His-Rich          |
| Q7Z417                               | Nuclear fragile X mental retardation-interacting protein 2   |                                    |                                          | His-Rich          |
| P25490                               | Transcriptional repressor protein YY1                        |                                    |                                          | His-Rich          |
| P31943                               | Heterogeneous nuclear ribonucleoprotein H                    |                                    |                                          |                   |
| P61978                               | Heterogeneous nuclear ribonucleoprotein K                    |                                    |                                          |                   |
| P14866                               | Heterogeneous nuclear ribonucleoprotein L                    |                                    |                                          |                   |
| O43390                               | Heterogeneous nuclear ribonucleoprotein R                    |                                    |                                          |                   |
| Q00839                               | Heterogeneous nuclear ribonucleoprotein U                    |                                    |                                          |                   |
| P04406                               | Glyceraldehyde-3-phosphate dehydrogenase                     |                                    |                                          | binds at low salt |
| P17612                               | cAMP-dependent protein kinase, alpha-catalytic subunit       |                                    |                                          |                   |
| P06748                               | Nucleophosmin                                                |                                    |                                          |                   |
| P19338                               | Nucleolin                                                    |                                    |                                          |                   |
| P62937                               | Peptidyl-prolyl cis-trans isomerase A                        |                                    |                                          |                   |
| P11387                               | DNA topoisomerase 1                                          |                                    |                                          |                   |
| Q8WXF1                               | Paraspeckle component 1                                      |                                    |                                          |                   |
| Q96QC0                               | Serine/threonine-protein phosphatase 1 regulatory subunit 10 |                                    |                                          |                   |
| Q10570                               | Cleavage and polyadenylation specificity factor subunit 1    |                                    |                                          |                   |
| O43809                               | Cleavage and polyadenylation specificity factor subunit 5    |                                    |                                          |                   |

|        |                                                                    |  |  |  |
|--------|--------------------------------------------------------------------|--|--|--|
| Q16630 | Cleavage and polyadenylation specificity factor subunit 6          |  |  |  |
| Q8N684 | Cleavage and polyadenylation specificity factor subunit 7          |  |  |  |
| Q92499 | ATP-dependent RNA helicase DDX1                                    |  |  |  |
| O00571 | ATP-dependent RNA helicase DDX3X                                   |  |  |  |
| P17844 | Probable ATP-dependent RNA helicase DDX5                           |  |  |  |
| O43143 | Putative pre-mRNA-splicing factor ATP-dependent RNA helicase DHX15 |  |  |  |
| Q15717 | ELAV-like protein 1                                                |  |  |  |
| Q6UN15 | Pre-mRNA 3'-end-processing factor FIP1                             |  |  |  |
| Q92797 | Symplekin                                                          |  |  |  |
| Q9Y224 | Protein C14orf166                                                  |  |  |  |
| Q9Y3B4 | Pre-mRNA branch site protein p14                                   |  |  |  |
| P09661 | U2 small nuclear ribonucleoprotein A'                              |  |  |  |
| Q15637 | Splicing factor 1                                                  |  |  |  |
| Q15459 | Splicing factor 3 subunit 1                                        |  |  |  |
| Q12874 | Splicing factor 3A subunit 3                                       |  |  |  |
| O75533 | Splicing factor 3B subunit 1                                       |  |  |  |
| Q13435 | Splicing factor 3B subunit 2                                       |  |  |  |
| Q15393 | Splicing factor 3B subunit 3                                       |  |  |  |
| Q15427 | Splicing factor 3B subunit 4                                       |  |  |  |
| Q9BWJ5 | Splicing factor 3B subunit 5                                       |  |  |  |
| P23246 | Splicing factor, proline- and glutamine-rich (PSF)                 |  |  |  |
| P62314 | Small nuclear ribonucleoprotein Sm D1                              |  |  |  |
| P62316 | Small nuclear ribonucleoprotein Sm D2                              |  |  |  |

|        |                                  |  |  |  |
|--------|----------------------------------|--|--|--|
| P62750 | 60S ribosomal protein L23a       |  |  |  |
| Q9UNX3 | 60S ribosomal protein L26-like 1 |  |  |  |
| P46783 | 40S ribosomal protein S10        |  |  |  |
| P09058 | 40S ribosomal protein S8         |  |  |  |
| Q15424 | Scaffold attachment factor B     |  |  |  |
| Q14151 | Scaffold attachment factor B2    |  |  |  |
| Q9Y310 | UPF0027 protein C22orf28         |  |  |  |
| Q8NCA5 | Protein FAM98A                   |  |  |  |
