# Supplementary material for: Arginine methylation and citrullination of splicing factor proline- and glutamine-rich (SFPQ/PSF) regulates its association with mRNA
Source: PubMed Central journal article supplement — RNA. 2015 Mar;21(3):347–59. doi: 10.1261/rna.045138.114 (PMC4338332; doi:10.1261/rna.045138.114), 2015-03
Supplement: supp_045138.114_SuppTableS2.pdf [file supp_045138.114_SuppTableS2.pdf]

Supplementary Table S2.

Modified peptides identified from the mass spectrometry analysis of SFPQ from mammalian cells and *in vitro*. Modified amino acids are highlighted in bold. aDMA = asymmetric dimethylarginine, MMA= monomethylarginine. Heavy aDMA = asymmetric dimethylarginine (CD<sub>3</sub>), Heavy MMA =monomethylarginine (CD<sub>3</sub>).

| Peptide                                      | Modification                    | Position     |
|----------------------------------------------|---------------------------------|--------------|
| <b>Mammalian cells</b>                       |                                 |              |
| DRFRSRGGGGGGFHR.R                            | 2 aDMA                          | 7, 9         |
| FRSRGGGGGGFHR                                | MMA,aDMA                        | 7, 9         |
| FRSRGGGGGGFHR                                | 2 aDMA                          | 7, 9         |
| SRGGGGGGFHR                                  | aDMA                            | 9            |
| RGGGGGRGGLHDFR                               | 2 aDMA                          | 19, 25       |
| GMGPGTPAGYGRGR                               | MMA                             | 693          |
| GMGPGTPAGYGR                                 | MMA                             | 693          |
|                                              |                                 |              |
| DRFRSRGGGGGGFHR                              | 2 heavy aDMA                    | 7, 9         |
| FRSRGGGGGGFHR                                | 2 heavy aDMA                    | 7, 9         |
| SRGGGGGGFHR                                  | heavy aDMA                      | 9            |
| RGGGGGRGGLHDFR                               | 2 heavy aDMA                    | 19, 25       |
| RGGGGGRGGLHDFRSPPPGMGLNQNR                   | 2 heavy aDMA, MMA               | 19, 25, 32   |
| GMGPGTPAGYGRGR                               | heavy MMA                       | 693          |
|                                              |                                 |              |
|                                              |                                 |              |
| <b>PRMT1 in vitro</b>                        |                                 |              |
| SRGGGGGGFHR                                  | MMA                             | 9            |
| SRGGGGGGFHR                                  | aDMA                            | 9            |
| RGGGGGRGGLHDFR                               | aDMA, MMA                       | 19, 25       |
| GGGGGRGGLHDFR                                | aDMA                            | 25           |
|                                              |                                 |              |
| <b>PADI4 in vitro</b>                        |                                 |              |
| SRGGGGGGFHR                                  | Citrullination                  | 9            |
| RGGGGGRGGLHDFR                               | Citrullination                  | 19           |
| RGGGGGRGGLHDFR                               | 2 Citrullination                | 19, 25       |
| GGGGGRGGLHDFR                                | Citrullination                  | 25           |
|                                              |                                 |              |
| <b>+PADI4/Ca<sup>2</sup> mammalian cells</b> |                                 |              |
|                                              |                                 |              |
| FRSRGGGGGGFHR                                | Citrullination, Dimethyl        | 7, 9         |
| RGGGGGRGGLHDFR                               | 2 Citrullination                | 19, 25       |
| RGGGGGRGGLHDFR                               | Citrullination Dimethyl         | 19, 25,32    |
| REEEMMIR                                     | Citrullination                  | 574          |
| TERFGQGGAGPVGGQGP                            | Citrullination                  | 666          |
| GMGPGTPAGYGRGREEYEGPNK                       | 2 Citrullination                | 693,695      |
| GMGPGTPAGYGRGREEYEGPNKKPRF                   | 2 Citrullination ,Methylation   | 693,695      |
| GMGPGTPAGYGRGREEYEGPNKKPRF.                  | 3 Citrullination Oxidation      | 693,695, 706 |
| GMGPGTPAGYGRGREEYEGPNKKPRF                   | Dimethylation, 2 citrullination | 693,695, 706 |
| GMGPGTPAGYGRGREEYEGPNKKPRF                   | Monomethyl, 2 citrullination    | 693,695, 706 |
